# Supplementary material for: Generation and molecular characterization of pancreatic cancer patient-derived xenografts reveals their heterologous nature
Source: PubMed Central journal article supplement (PMC5308744; doi:10.18632/oncotarget.11530), 2016-08-23
Supplement: oncotarget-07-62533-s001.pdf [file oncotarget-07-62533-s001.pdf]

## Generation and molecular characterization of pancreatic cancer patient-derived xenografts reveals their heterologous nature

### SUPPLEMENTARY FIGURES AND TABLES

**A**

PDX-3

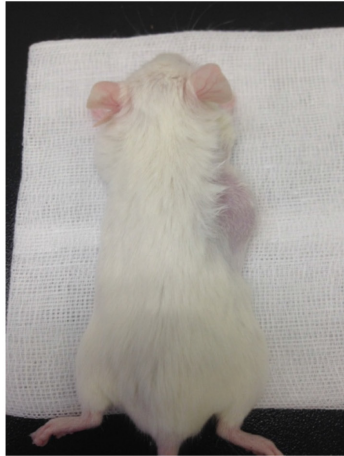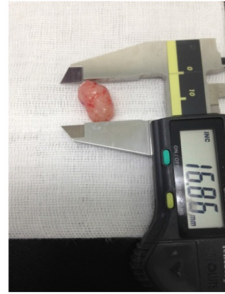

**B**

PDX-4

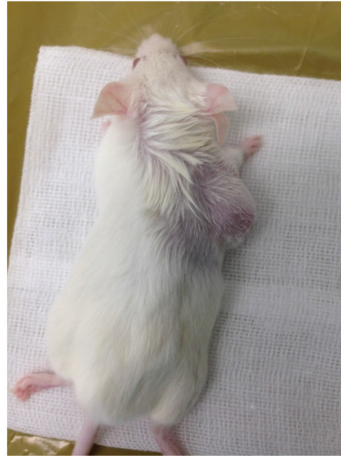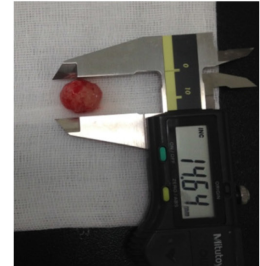

**Supplementary Figure S1: Examples of pancreatic patient-derived xenografts (PDXs) generated in NOD-SCID mice.** Left: Before dissection; right: tumor in calipers after dissection.

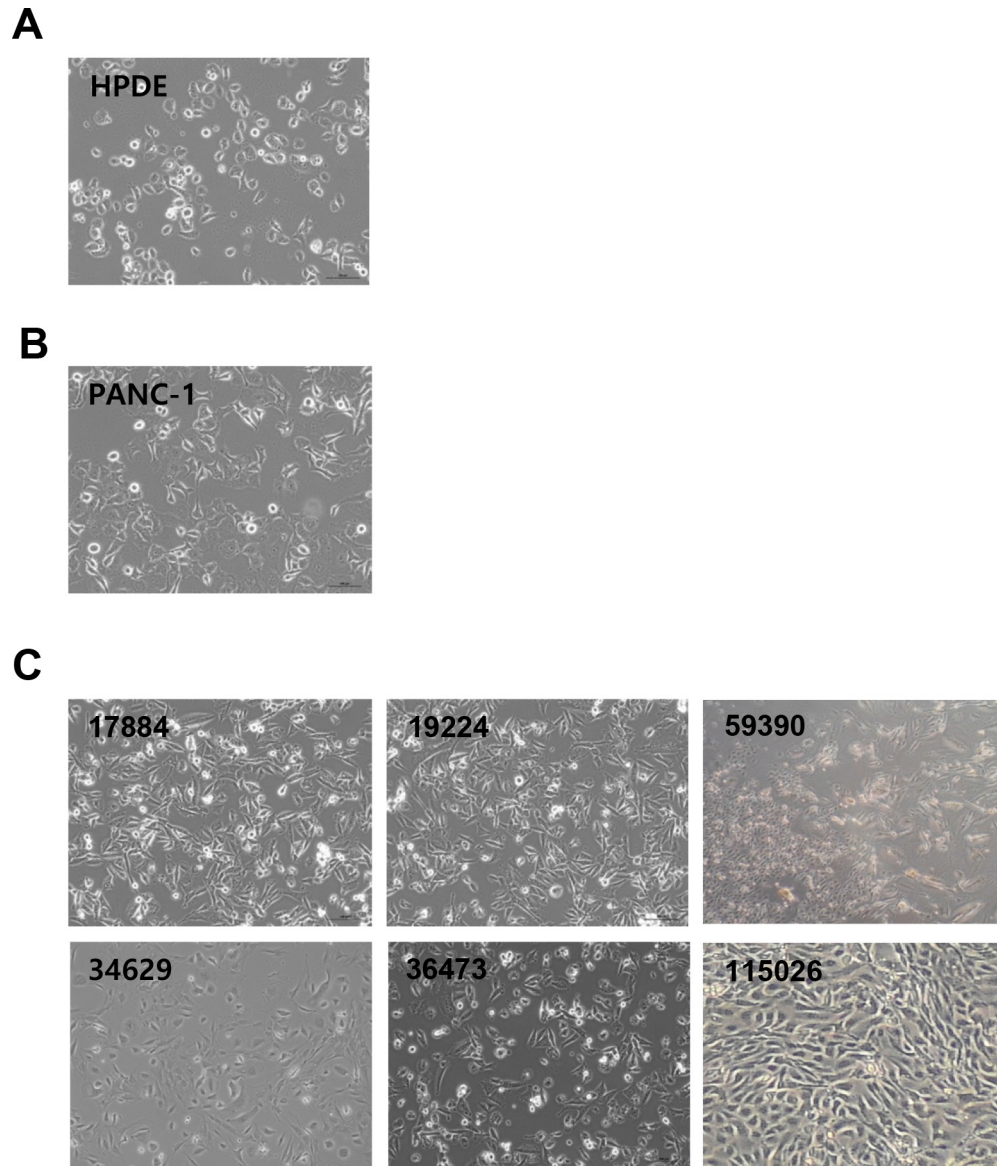

**Supplementary Figure S2: Representative picture of primary cancer cells derived from patient-derived xenografts (PDXs) and cell lines. A.** Human pancreatic ductal epithelial cell (as a normal control). **B.** Panc1 pancreatic ductal adenocarcinoma cell (as a cancer control). **C.** Human pancreatic primary cancer cells from PDX tissues.

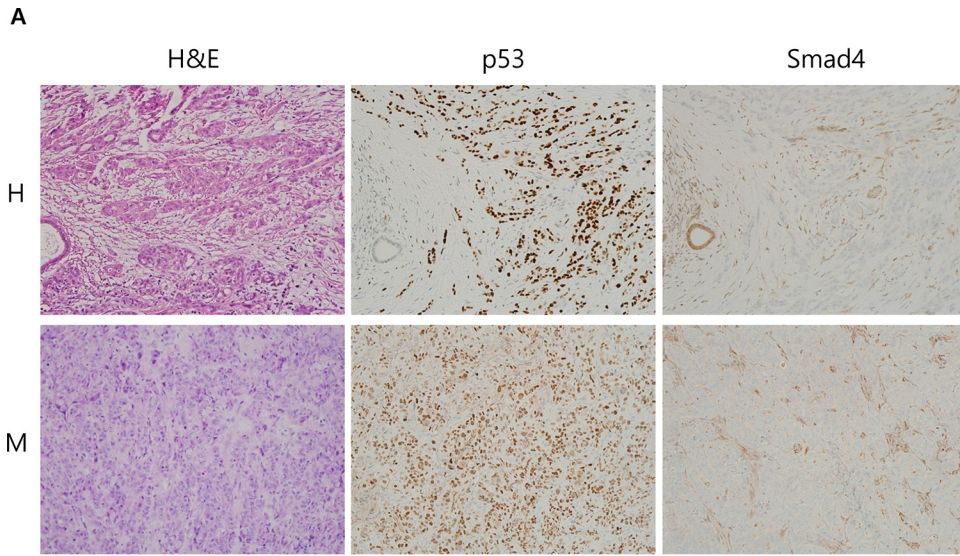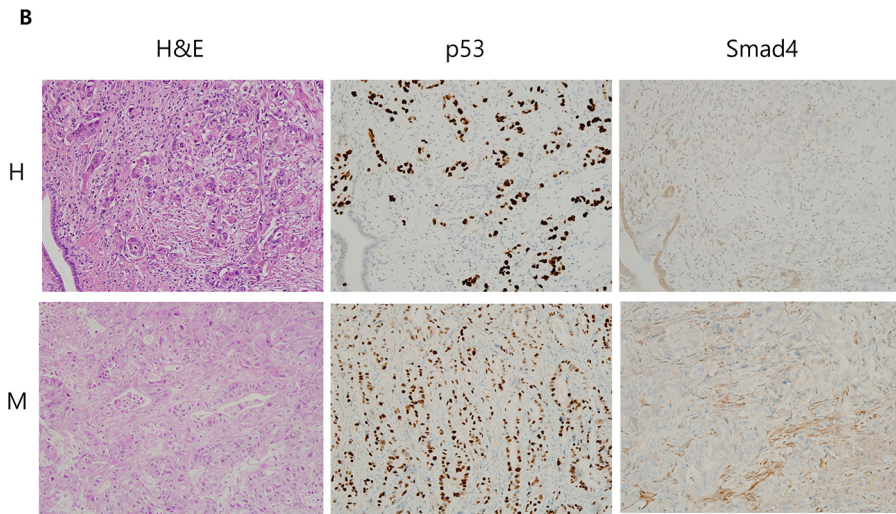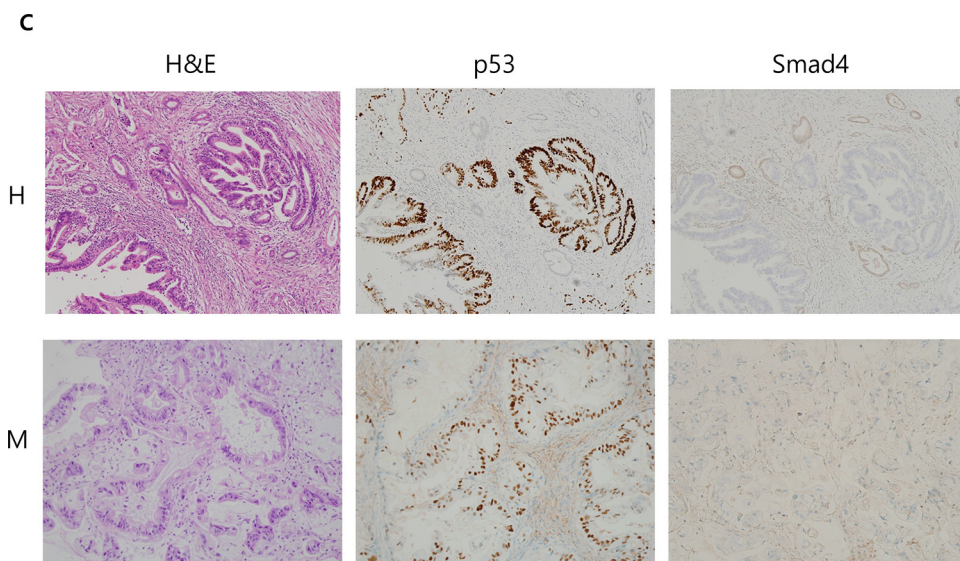

(Continued)

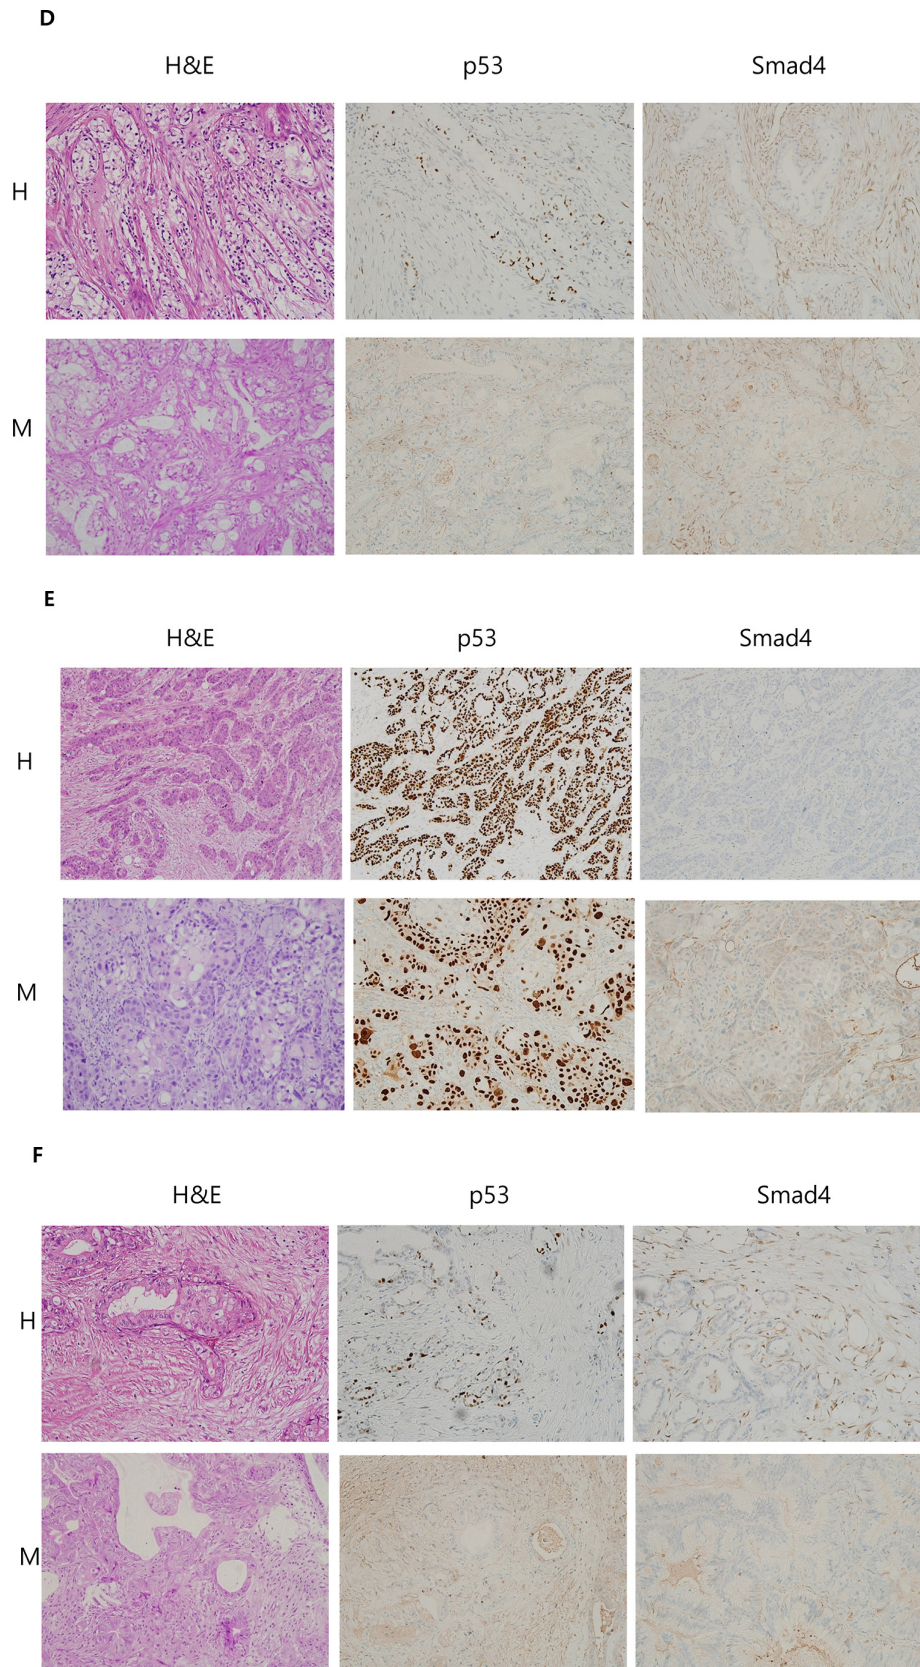

(Continued)

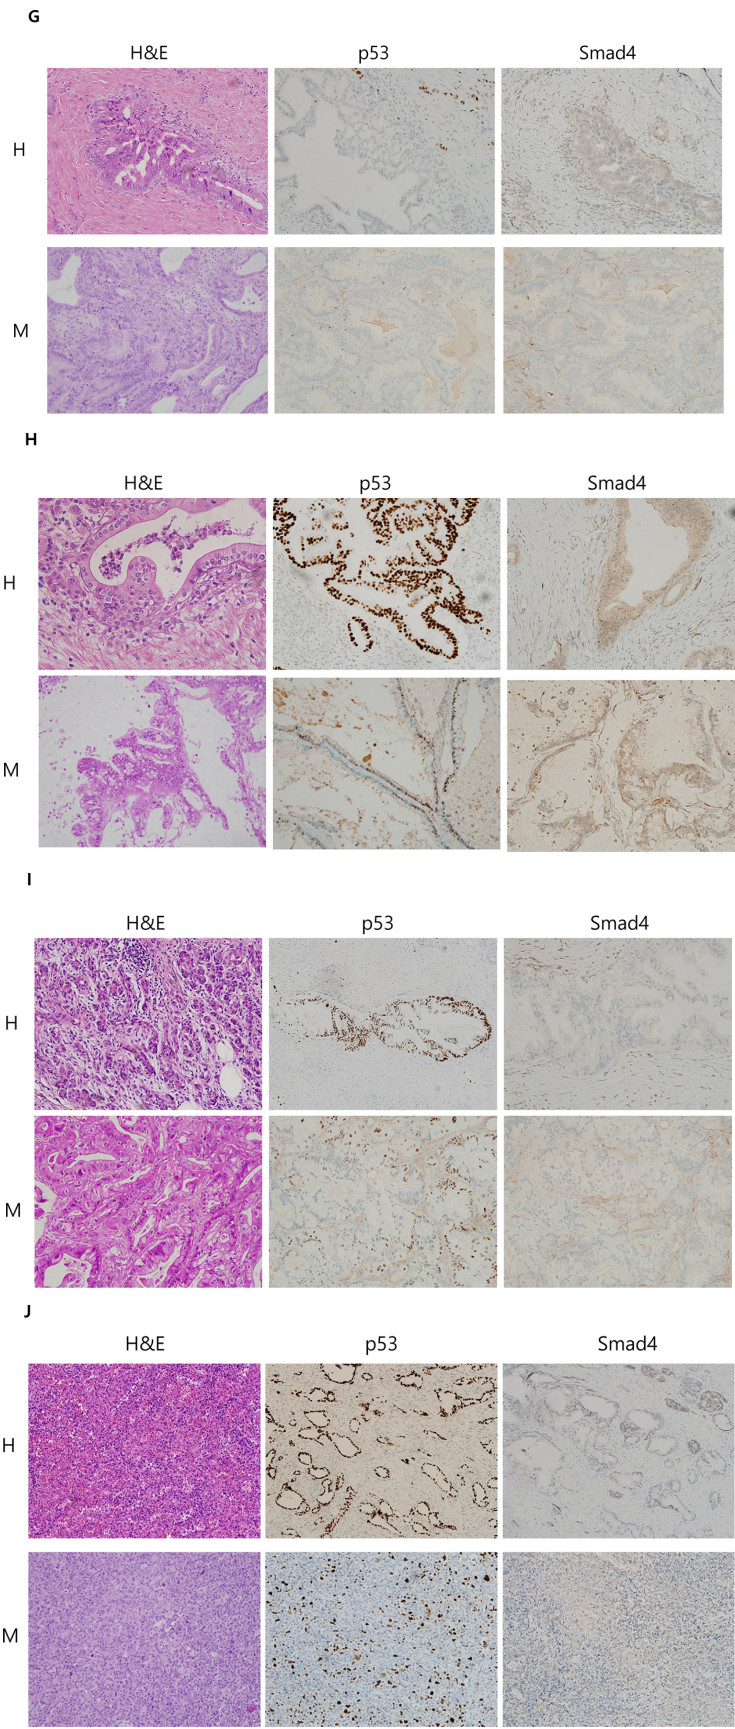

(Continued)

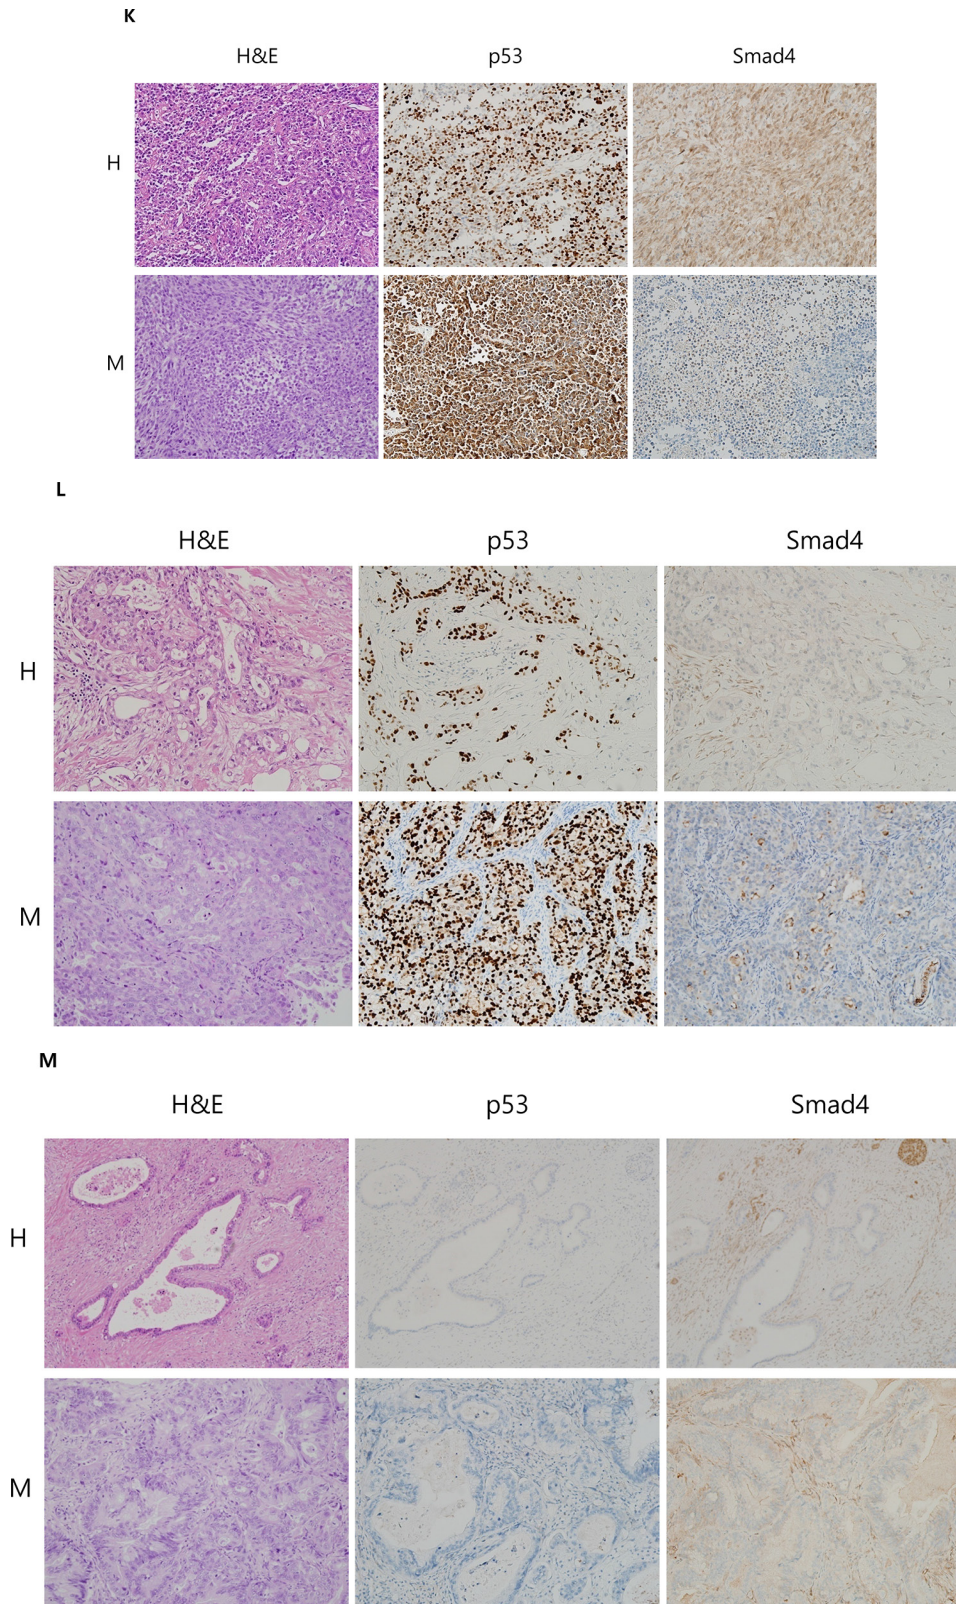

**Supplementary Figure S3: A to M.** Immunohistochemistry (IHC) or hematoxylin and eosin (H&E) histological data from the primary tumors AMC004 to AMC017 (upper panels; marked as H(Human)) or a patient-derived xenograft (PDX) tumor (lower panels; marked as M(Mouse)). Representative pictures of H&E staining, and p53 and Smad4 IHC are shown.



Supplementary Table S1: Clinical parameters of pancreatic cancer primary cells

| Primary cell ID | Gender | Age | Pathological parameters |    |    |   |                                        |
|-----------------|--------|-----|-------------------------|----|----|---|----------------------------------------|
|                 |        |     | Stage                   | pT | pN | M | Histology_type                         |
| 17884           | F      | 48  | IIB                     | 3  | 1  | 0 | Pancreatic ductal adenocarcinoma       |
| 19224           | M      | 61  | IIB                     | 3  | 1  | 0 | Pancreatic ductal adenocarcinoma       |
| 34629           | F      | 64  | IIA                     | 3  | 0  | 0 | Pancreatic ductal adenocarcinoma       |
| 36473           | F      | 59  | IIB                     | 3  | 1  | 0 | Pancreatic sarcomatoid adenocarcinoma* |

Five-digit numbers were assigned for identification purposes and the clinical features of each primary cell type are listed.



**Supplementary Table S2: List of the genes with single nucleotide polymorphisms (SNPs) that were predicted as being functionally important**

See Supplementary File 1

Supplementary Table S3: Functional annotation of the variants

| Effect                                         | dbSNP  | dbSNP(%) | Novel  | Novel(%) | Total       |
|------------------------------------------------|--------|----------|--------|----------|-------------|
| ***TOTAL                                       | 30,796 | 10000    | 10,031 | 10000    | 40,827      |
| 3_prime_UTR_variant                            | 284    | 92       | 100    | 100      | 384         |
| 5_prime_UTR_premature_start_codon_gain_variant | 14     | 5        | 0      | 0        | 14          |
| 5_prime_UTR_variant                            | 97     | 31       | 33     | 33       | 130         |
| disruptive_inframe_deletion                    | 7      | 2        | 16     | 16       | 23          |
| disruptive_inframe_insertion                   | 4      | 1        | 10     | 10       | 14          |
| downstream_gene_variant                        | 1,621  | 526      | 490    | 488      | 2,111       |
| frameshift_variant                             | 13     | 4        | 15     | 15       | 28          |
| inframe_deletion                               | 0      | 0        | 7      | 7        | 7           |
| inframe_insertion                              | 0      | 0        | 16     | 16       | 16          |
| intergenic_region                              | 1      | 0        | 0      | 0        | 1           |
| intragenic_variant                             | 0      | 0        | 2      | 2        | 2           |
| intron_variant                                 | 3,441  | 1120     | 1,418  | 1410     | 4,859       |
| missense_variant                               | 804    | 261      | 342    | 341      | 1,146       |
| non_coding_exon_variant                        | 867    | 282      | 228    | 227      | 1,095       |
| sequence_feature                               | 20,612 | 6690     | 6,543  | 6520     | 27,155      |
| splice_acceptor_variant                        | 22     | 7        | 2      | 2        | 24          |
| splice_donor_variant                           | 0      | 0        | 3      | 3        | 3           |
| splice_region_variant                          | 340    | 110      | 243    | 242      | 583         |
| stop_gained                                    | 0      | 0        | 15     | 15       | 15          |
| synonymous_variant                             | 1,482  | 481      | 144    | 144      | 1,626       |
| TF_binding_site_variant                        | 6      | 2        | 1      | 1        | 7           |
| upstream_gene_variant                          | 1,181  | 383      | 403    | 402      | 1,584       |
| #of variants in coding and UTR                 |        |          |        |          | <b>1804</b> |

UTR: Untranslated region; TF: transcription factor.

**Supplementary Table S4: List of the variants that were predicted to be deleterious, as identified using Comprehensive Cancer Panel (CCP) data.** REF: reference sequence; ALT: altered sequence; HGVS: Human Genome Variation Society.

See Supplementary File 1

**Supplementary Table S5: The number of known variants identified in each of the tumors by Comprehensive Cancer Panel (CCP) analysis**

| Sample | nSNPs | nInsertions | nDeletions | nComplex | nTotal | nHets | nHomVar | nSingletons | heterozygosity | hetHomRatio |
|--------|-------|-------------|------------|----------|--------|-------|---------|-------------|----------------|-------------|
| 115026 | 616   | 30          | 50         | 38       | 734    | 456   | 278     | 23          | 1.00E-07       | 1.64        |
| 13-1   | 586   | 34          | 51         | 33       | 704    | 398   | 306     | 0           | 1.00E-07       | 1.3         |
| 13-2   | 584   | 33          | 52         | 32       | 701    | 397   | 304     | 1           | 1.00E-07       | 1.31        |
| 17-1   | 606   | 39          | 57         | 31       | 733    | 434   | 299     | 6           | 1.00E-07       | 1.45        |
| 17-2   | 581   | 36          | 52         | 27       | 696    | 330   | 366     | 0           | 1.00E-07       | 0.9         |
| 18-1   | 554   | 31          | 51         | 37       | 673    | 356   | 317     | 2           | 1.00E-07       | 1.12        |
| 18-2   | 552   | 33          | 46         | 37       | 668    | 347   | 321     | 0           | 1.00E-07       | 1.08        |
| 2-1    | 587   | 33          | 50         | 33       | 703    | 398   | 305     | 3           | 1.00E-07       | 1.3         |
| 2-2    | 561   | 34          | 48         | 33       | 676    | 330   | 346     | 0           | 1.00E-07       | 0.95        |
| 20-1   | 563   | 33          | 55         | 34       | 685    | 400   | 285     | 16          | 1.00E-07       | 1.4         |
| 20-2   | 538   | 35          | 50         | 36       | 659    | 308   | 351     | 16          | 1.00E-07       | 0.88        |
| 34629  | 591   | 29          | 52         | 34       | 706    | 389   | 317     | 18          | 1.00E-07       | 1.23        |
| 5-1    | 581   | 34          | 51         | 35       | 701    | 416   | 285     | 0           | 1.00E-07       | 1.46        |
| 5-2    | 582   | 34          | 51         | 33       | 700    | 418   | 282     | 1           | 1.00E-07       | 1.48        |
| 6-1    | 592   | 36          | 54         | 33       | 715    | 411   | 304     | 2           | 1.00E-07       | 1.35        |
| 6-2    | 541   | 34          | 49         | 36       | 660    | 331   | 329     | 0           | 1.00E-07       | 1.01        |
| 7-1    | 596   | 34          | 51         | 38       | 719    | 393   | 326     | 0           | 1.00E-07       | 1.21        |
| 7-2    | 598   | 34          | 46         | 37       | 715    | 385   | 330     | 1           | 1.00E-07       | 1.17        |
| 8-1    | 635   | 40          | 52         | 35       | 762    | 483   | 279     | 8           | 2.00E-07       | 1.73        |
| 8-2    | 563   | 40          | 45         | 33       | 681    | 326   | 355     | 0           | 1.00E-07       | 0.92        |

**Supplementary Table S6: The number of novel variants identified in each of the tumors by Comprehensive Cancer Panel (CCP) analysis**

| Sample | nSNPs | nInsertions | nDeletions | nComplex | nTotal | nHets | nHomVar | nSingletons | heterozygosity | hetHomRatio |
|--------|-------|-------------|------------|----------|--------|-------|---------|-------------|----------------|-------------|
| 115026 | 42    | 1           | 15         | 2        | 60     | 57    | 3       | 13          | 0              | 19          |
| 13-1   | 40    | 3           | 15         | 3        | 61     | 57    | 4       | 2           | 0              | 14.2        |
| 13-2   | 35    | 3           | 13         | 3        | 54     | 53    | 1       | 3           | 0              | 53          |
| 17-1   | 34    | 2           | 15         | 2        | 53     | 49    | 4       | 0           | 0              | 12.2        |
| 17-2   | 33    | 3           | 15         | 4        | 55     | 52    | 3       | 0           | 0              | 17.3        |
| 18-1   | 42    | 2           | 18         | 3        | 65     | 63    | 2       | 3           | 0              | 31.5        |
| 18-2   | 36    | 2           | 14         | 2        | 54     | 53    | 1       | 0           | 0              | 53          |
| 2-1    | 42    | 4           | 13         | 4        | 63     | 58    | 5       | 4           | 0              | 11.6        |
| 2-2    | 29    | 3           | 13         | 3        | 48     | 42    | 6       | 0           | 0              | 7           |
| 20-1   | 36    | 2           | 14         | 2        | 54     | 48    | 6       | 11          | 0              | 8           |
| 20-2   | 31    | 2           | 13         | 3        | 49     | 43    | 6       | 5           | 0              | 7.17        |
| 34629  | 28    | 1           | 13         | 4        | 46     | 45    | 1       | 8           | 0              | 45          |
| 5-1    | 34    | 4           | 14         | 3        | 55     | 51    | 4       | 0           | 0              | 12.8        |
| 5-2    | 35    | 4           | 17         | 3        | 59     | 58    | 1       | 1           | 0              | 58          |
| 6-1    | 32    | 3           | 11         | 3        | 49     | 44    | 5       | 3           | 0              | 8.8         |
| 6-2    | 33    | 3           | 16         | 3        | 55     | 49    | 6       | 4           | 0              | 8.17        |
| 7-1    | 37    | 2           | 13         | 4        | 56     | 54    | 2       | 3           | 0              | 27          |
| 7-2    | 24    | 2           | 14         | 4        | 44     | 42    | 2       | 0           | 0              | 21          |
| 8-1    | 44    | 1           | 17         | 4        | 66     | 58    | 8       | 1           | 0              | 7.25        |
| 8-2    | 42    | 1           | 16         | 2        | 61     | 58    | 3       | 4           | 0              | 19.3        |

Supplementary Table S7: Coverage of the Comprehensive Cancer Panel (CCP) analysis

| Sample | ×1(%) | ×5(%) | ×10(%) | ×15(%) | ×20(%) | ×25(%) | ×30(%) | ×50(%) | total_bases_<br>aligned_bases | mean_<br>coverage_<br>depth |
|--------|-------|-------|--------|--------|--------|--------|--------|--------|-------------------------------|-----------------------------|
| 115026 | 99.8  | 99.6  | 99.5   | 99.3   | 99.3   | 99.2   | 99.1   | 98.9   | 2,978,186,056                 | 1760                        |
| 13-1   | 99.8  | 99.6  | 99.5   | 99.4   | 99.3   | 99.2   | 99.2   | 98.9   | 2,723,116,470                 | 1610                        |
| 13-2   | 99.9  | 99.7  | 99.5   | 99.4   | 99.3   | 99.2   | 99.1   | 98.9   | 2,109,245,791                 | 1250                        |
| 17-1   | 99.8  | 99.6  | 99.5   | 99.4   | 99.3   | 99.2   | 99.1   | 98.9   | 2,389,805,922                 | 1420                        |
| 17-2   | 99.8  | 99.6  | 99.5   | 99.3   | 99.3   | 99.2   | 99.1   | 98.8   | 2,121,760,748                 | 1260                        |
| 18-1   | 99.9  | 99.7  | 99.6   | 99.5   | 99.4   | 99.3   | 99.2   | 99     | 3,010,370,819                 | 1780                        |
| 18-2   | 99.9  | 99.8  | 99.6   | 99.6   | 99.5   | 99.4   | 99.3   | 99.1   | 3,051,246,526                 | 1810                        |
| 2-1    | 99.8  | 99.6  | 99.5   | 99.4   | 99.4   | 99.3   | 99.3   | 99.1   | 3,330,983,419                 | 1970                        |
| 2-2    | 99.8  | 99.6  | 99.3   | 99.1   | 98.9   | 98.7   | 98.6   | 98.1   | 1,964,565,898                 | 1160                        |
| 20-1   | 99.8  | 99.6  | 99.5   | 99.4   | 99.3   | 99.1   | 99     | 98.7   | 3,212,141,634                 | 1900                        |
| 20-2   | 99.7  | 99.5  | 99.3   | 99.3   | 99.2   | 99.1   | 99     | 98.8   | 2,369,919,932                 | 1400                        |
| 34629  | 99.9  | 99.7  | 99.6   | 99.5   | 99.4   | 99.3   | 99.2   | 99     | 2,632,180,839                 | 1560                        |
| 5-1    | 99.8  | 99.6  | 99.5   | 99.4   | 99.4   | 99.3   | 99.2   | 99     | 3,594,801,890                 | 2130                        |
| 5-2    | 99.9  | 99.7  | 99.6   | 99.5   | 99.5   | 99.4   | 99.3   | 99.1   | 2,416,077,435                 | 1430                        |
| 6-1    | 99.8  | 99.5  | 99.4   | 99.2   | 99     | 98.9   | 98.8   | 98.5   | 1,787,704,037                 | 1060                        |
| 6-2    | 99.9  | 99.6  | 99.5   | 99.4   | 99.3   | 99.2   | 99.2   | 98.9   | 2,494,578,771                 | 1480                        |
| 7-1    | 99.8  | 99.6  | 99.5   | 99.3   | 99.3   | 99.1   | 99.1   | 98.8   | 3,088,396,179                 | 1830                        |
| 7-2    | 99.9  | 99.7  | 99.6   | 99.5   | 99.4   | 99.3   | 99.2   | 99     | 2,645,211,631                 | 1570                        |
| 8-1    | 99.8  | 99.6  | 99.4   | 99.4   | 99.3   | 99.2   | 99.1   | 98.8   | 2,457,867,852                 | 1460                        |
| 8-2    | 99.8  | 99.5  | 99.3   | 99.1   | 99     | 98.9   | 98.9   | 98.6   | 2,224,617,317                 | 1320                        |

Each column indicates the depths, ranging from ×1 to ×50, and each cell represents the proportion of genes with a higher depth than indicated.
